# Supplementary material
Source: PubMed Central journal article supplement (PMC3124313)

## Legends to Supplementary Figures

**Figure S1. The characteristics of the peptide anchor residues place Patr-AL in the A02 supertype.** The anchor residues found for Patr-AL in this study are shown at the top. Anchor residues reported in the SYFPETHI database for other HLA-A and Patr-A allotypes are grouped by their supertype designation (Sidney et al). U denotes unclassified supertype. Anchor residues are in bold and auxillary anchors in italics. Identities with anchor and auxiliary anchor residues of Patr-AL are given in red and blue, respectively. The residues at positions 9 and 116 of the MHC sequence are shown to the right.

**Figure S2. Amino acid sequences of peptides bound to Patr-AL, HLA-A\*0201, and HLA-A\*0207.** Protein of origin and GenBank accession number are shown for each peptide. Anchor residues are boldened.

**Figure S3. Alignment of the amino-acid sequences of Patr-AL, HLA-A\*0201, and HLA-A\*0207.** The leader peptide is not included. Domain boundaries are indicated by short vertical lines above the Patr-AL sequence. Patr-AL EAL-2 is the most common allele and was used for the structure determination.

**Figure S4. Stereoscopic view of electron density around the peptide ALDKATVLL contoured at  $1\sigma$ .** Peptide is colored by *B*-factor on a scale from 20 to 50 Å<sup>2</sup> (blue to red).

**Figure S5. Details of the allotypes and peptides compared in Figure 4E.** For comparison of peptide conformation, residues 1-180 of Patr-AL were aligned using PyMOL to the following structures (Protein Data Bank ID indicated in brackets): HLA-A\*0201-LLFGYPVYV (1HHK), HLA-A\*0201 FLWGPRALV (1QEW), HLA-A\*0201 ALWGFFPVV (1B0G), HLA-A\*0201 GILGFVFTL (1HHI), HLA-A\*0201 TLTSCNTSV (1HHG), HLA-B\*4401 (1SYV), HLA-B\*4403 (1SYS), HLA-A\*0101 (1W72), HLA-A\*0201 (1HHJ), HLA-B\*5301 (1A1O), HLA-C\*0401 (1QQD), HLA-B\*2705 (1A83), HLA-B\*3501 (2CIK), HLA-E\*0101 (1MHE), HLA-B\*1501 (1XR9), HLA-Cw\*0301 (1EFX), HLA-G\*0101 (2D31), HLA-B\*0801 (1M05), HLA-A\*1101 (2HN7),

HLA-A\*1101 (1X7Q), HLA-A\*2402 (2BCK). Root mean-square distances between Ca carbons of peptides in different structures were measured in PyMOL.

**Figure S6. Phylogenetic analysis of the gene segment beginning 300bp upstream of the ATG start codon and ending in exon 2 for MHC-A and –AL.** Phylogenetic reconstruction was performed using neighbor-joining, maximum-likelihood, and maximum-parsimony methods. Shown is the maximum likelihood tree, with midpoint rooting and black, grey and white circles indicating  $\geq 80$ , 60 and 50% bootstrap support, respectively, with all three methods. For four nodes where one of the three methods had support of  $< 50\%$  the values for the remaining methods are shown (from top to bottom: neighbor-joining, parsimony, and maximum likelihood). The node support was omitted for the nodes not supported by at least two methods with values  $\geq 50\%$ .

Supplemental figure S1

| supertype  | allotype    | Peptide residue |         |        |   |       |       |       |    |            | MHC residue |     |
|------------|-------------|-----------------|---------|--------|---|-------|-------|-------|----|------------|-------------|-----|
|            |             | 1               | 2       | 3      | 4 | 5     | 6     | 7     | 8  | 9 (C-term) | 9           | 116 |
| A02        | Patr-AL     |                 | LQVMI   | D      |   |       |       |       |    | LVIFA      | F           | Y   |
|            | HLA-A*0201  |                 | LM      |        |   |       | V     |       |    | VL         | F           | Y   |
|            | HLA-A*0202  |                 | LV      |        |   |       |       |       |    | L          | F           | Y   |
|            | HLA-A*0204  |                 | L       |        |   |       |       |       |    | L          | F           | Y   |
|            | HLA-A*0205  |                 | VLIMQ   |        |   |       | VLA   |       |    | L          | Y           | Y   |
|            | HLA-A*0206  |                 | V       |        |   |       |       |       |    | V          | Y           | Y   |
|            | HLA-A*0207  |                 | L       | D      |   |       |       |       |    | L          | F           | Y   |
|            | HLA-A*0214  |                 | VQL     |        |   |       | LVF   |       |    | L          | Y           | Y   |
|            | HLA-A*0217  |                 | L       | P      |   |       |       |       |    | L          | F           | Y   |
|            | HLA-A*6802  |                 | TV      |        |   |       |       |       |    | VL         | Y           | Y   |
| HLA-A*6901 |             | VTA             | IFLM    |        |   | IFL   |       |       | VL | Y          | Y           |     |
| A24        | HLA-A*24    |                 | Y       |        |   | IV    | F     |       |    | ILF        | S           | Y   |
|            | HLA-A*2402  |                 | YF      |        |   |       |       |       |    | LFI        | S           | Y   |
|            | Patr-A*0701 |                 | YFMLI   |        |   |       |       |       |    | VLMFAI     | S           | L   |
|            | Patr-A*0901 |                 | WYF     |        |   |       |       |       |    | MLIVA      | S           | Y   |
| A01        | HLA-A*01    |                 | TS      | DE     |   |       |       | L     |    | Y          | F           | D   |
|            | HLA-A*3002  |                 | YFLV    |        |   |       |       |       |    | Y          | S           | H   |
|            | HLA-A*3003  |                 | FYIVL   |        |   |       |       |       |    | Y          | S           | H   |
|            | HLA-A*3004  |                 | VYTQMIF |        |   |       |       |       |    | YML        | S           | H   |
|            | HLA-A*2601  |                 | VTILF   |        |   |       | ILV   |       |    | YF         | Y           | D   |
|            | HLA-A*2602  |                 | VTILF   |        |   |       | ILV   |       |    | YF         | Y           | N   |
|            | HLA-A*2603  | E               | VTILF   |        |   |       | FILVY |       |    | YFML       | Y           | D   |
| A03        | HLA-A*03    |                 | LVM     | FY     |   |       | IMFVL | ILMF  |    | KYF        | F           | D   |
|            | HLA-A*1101  |                 | VIFY    | MLFYIA |   |       |       | LIYVF |    | KR         | Y           | D   |
|            | HLA-A*3101  |                 | LVYF    | FLYW   |   |       | LFVI  |       |    | R          | T           | D   |
|            | HLA-A*3303  |                 | AILFYV  |        |   |       |       |       |    | R          | T           | D   |
|            | HLA-A*6601  | ED              | TV      |        |   |       |       |       |    | RK         | Y           | D   |
|            | HLA-A*6602  | S               | VT      |        |   |       |       |       |    | R          | Y           | D   |
|            | HLA-A*6603  | S               | VT      |        |   |       |       |       |    | R          | Y           | D   |
|            | HLA-A*6801  | DE              | VT      |        |   |       |       |       |    | RK         | Y           | D   |
|            | Patr-A*0101 |                 | FMLI    |        |   |       |       |       |    | RK         | F           | D   |
|            | Patr-A*0301 |                 | ASTGIV  |        |   |       |       |       |    | RKY        | Y           | D   |
| A01 A03    | HLA-A*3001  |                 | YF      |        |   |       |       |       |    | L          | S           | H   |
| A01 A24    | HLA-A*2902  |                 | E       | F      |   |       |       |       |    | Y          | T           | D   |
| U          | Patr-A*0401 | HKRACMSY        |         |        |   | YFMRW |       |       |    | RK         | S           | D   |
| U          | Patr-A*0602 |                 |         | ANSQT  |   |       | P     | LIVM  |    | Y          | S           | D   |



### Supplemental figure S3

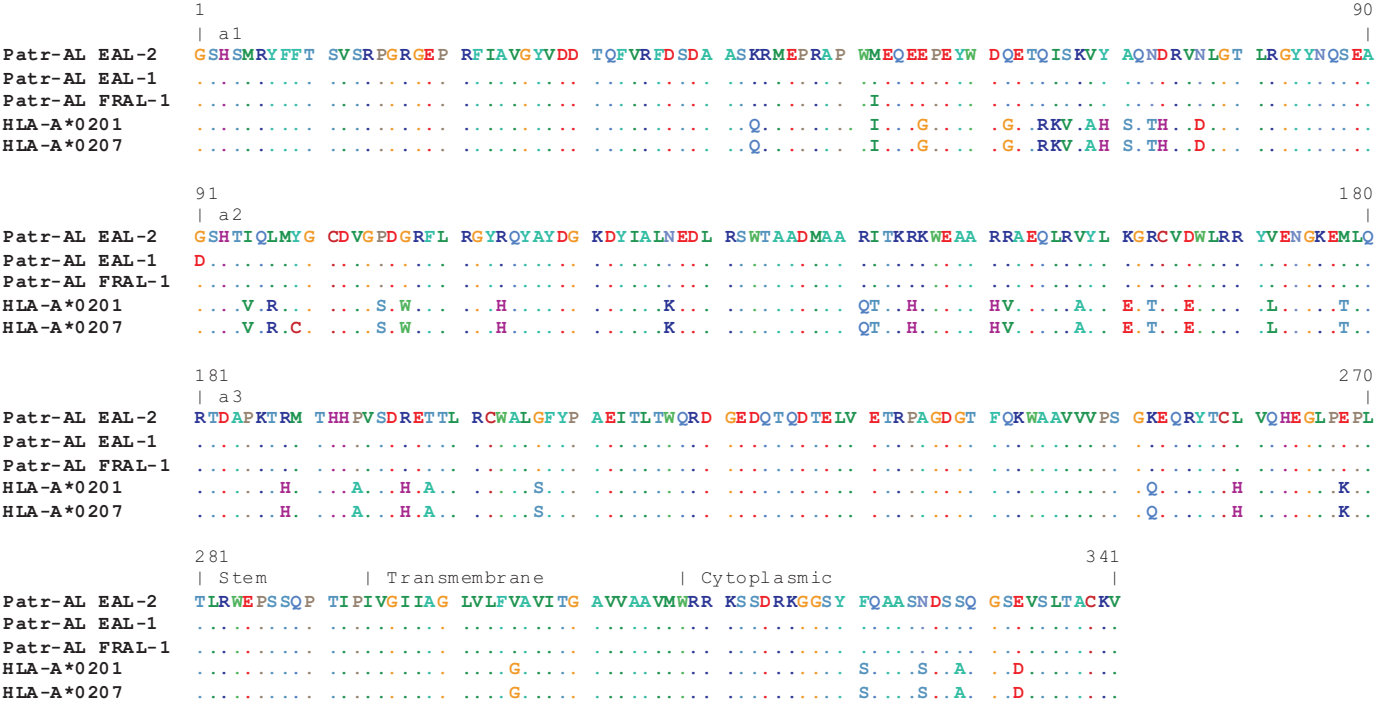

Supplemental figure S4

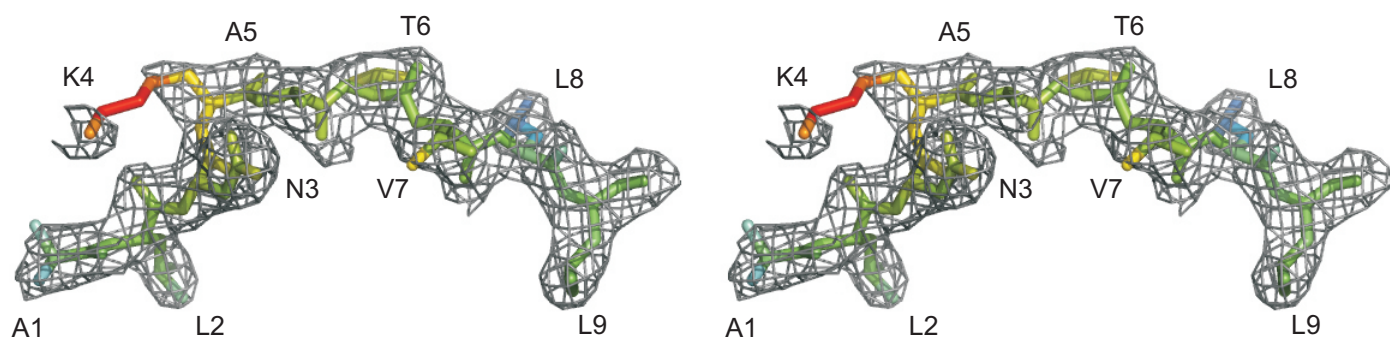

Supplemental figure S5

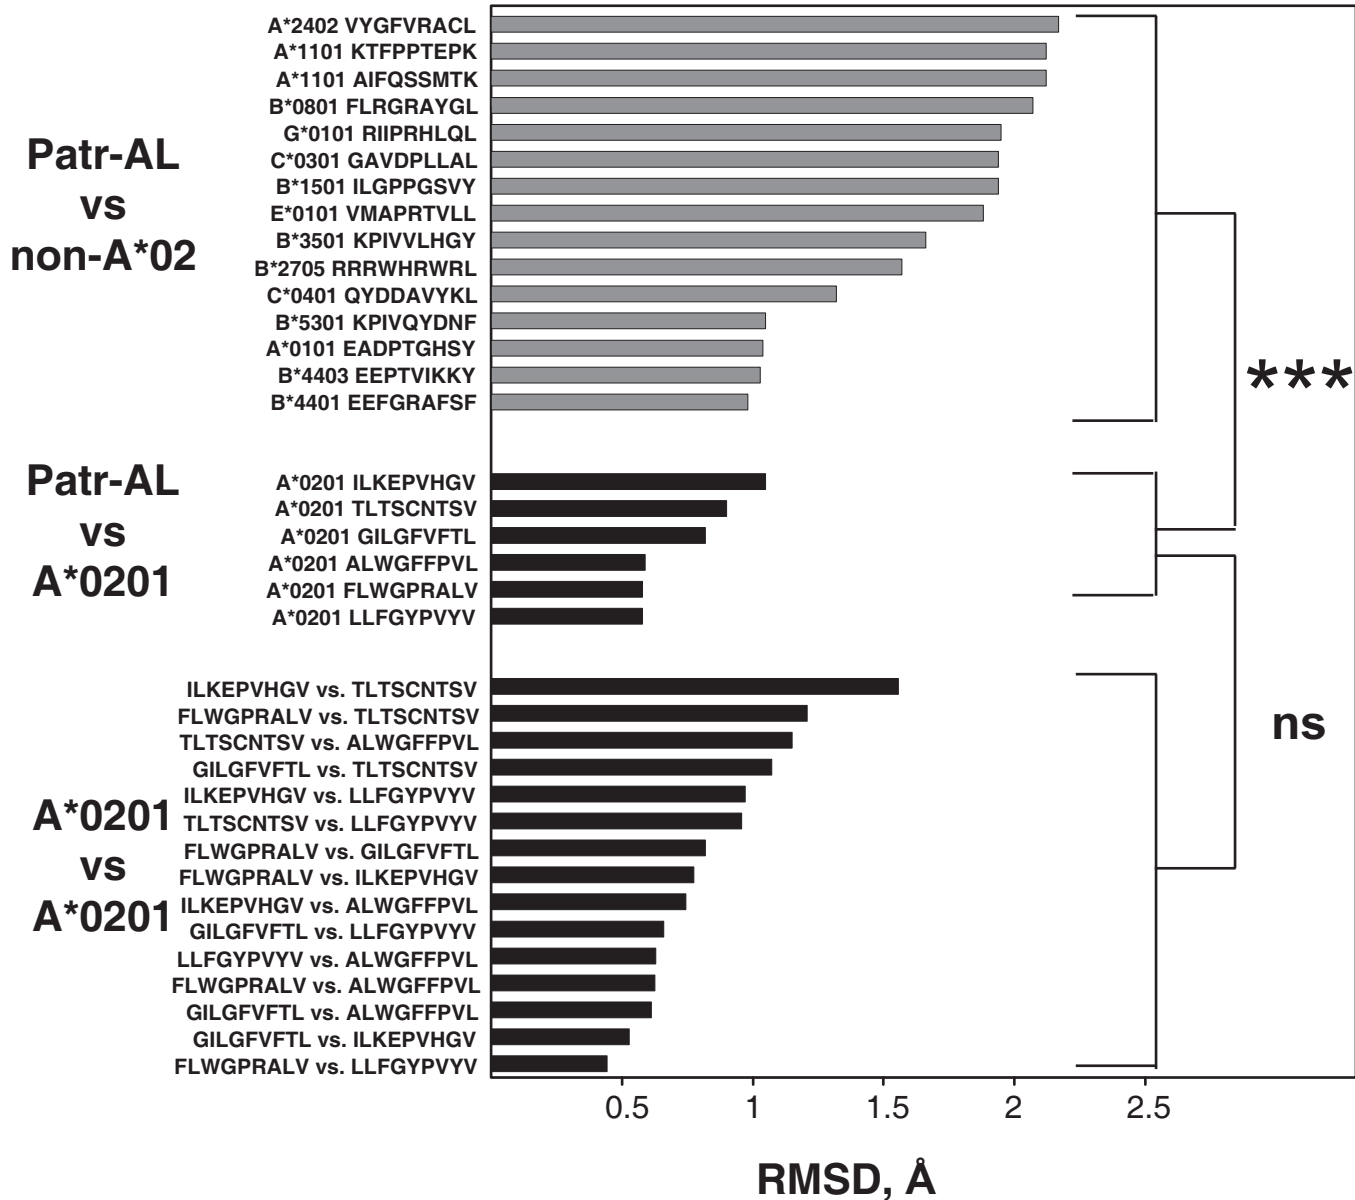

Supplemental figure S6

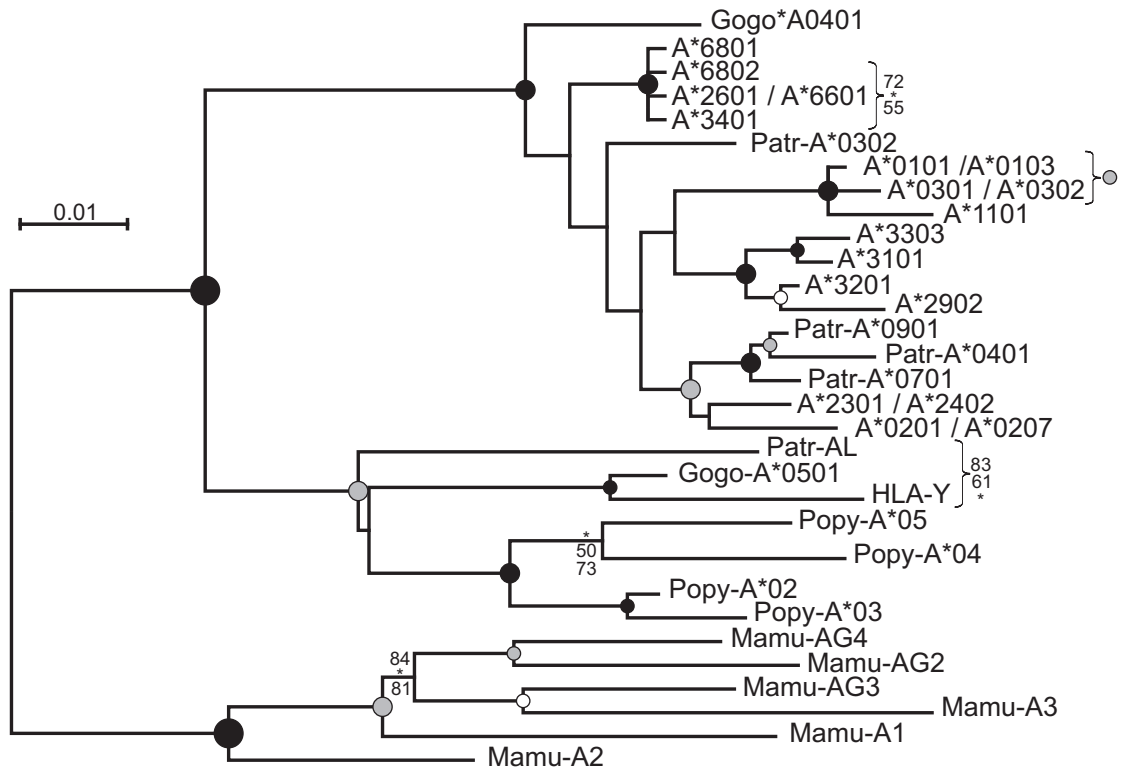

Supplement: NIHMS295042-supplement-supplement_1.pdf [file NIHMS295042-supplement-supplement_1.pdf]
